# Supplementary material
Source: PubMed Central journal article supplement (PMC4148786)

**Title**

A novel outer membrane protein involved in cellulose and cellooligosaccharide degradation by *Cytophaga hutchinsonii*

**Running title**

Cellulose degradation by *Cytophaga hutchinsonii*

**Authors**

Xiaofei Ji<sup>1,2</sup>, Ying Wang<sup>1</sup>, Cong Zhang<sup>1</sup>, Xinfeng Bai<sup>1</sup>, Weican Zhang<sup>1</sup> and Xuemei Lu<sup>1\*</sup>

**Authors' affiliation**

<sup>1</sup> State Key Laboratory of Microbial Technology, School of Life Science, Shandong University, Jinan 250100, China

<sup>2</sup> Department of Pathogenic Biology, Binzhou Medical University, Shandong Province, Yantai 264003, China

\*Corresponding author. Address: State Key Laboratory of Microbial Technology,

School of Life Science, Shandong University, Jinan

250100, China.

Tel: +86-531-88369495.

Fax: +86-531-88565610.

E-mail: [luxuemei@sdu.edu.cn](mailto:luxuemei@sdu.edu.cn)

**Fig. S1.** Growth curve and the changes of cellobiose and glucose in the cellobiose culture. A, Growth curve of the wild type of *C. hutchinsonii* (WT) and changes of cellobiose and glucose in the cellobiose culture; B, Growth curve of the *CHU\_1277* disrupted mutant ( $\Delta 1277$ ) and changes of cellobiose and glucose in the cellobiose culture. Symbol indication: ●, wild type; ■, mutant; ○, glucose; □, cellobiose.

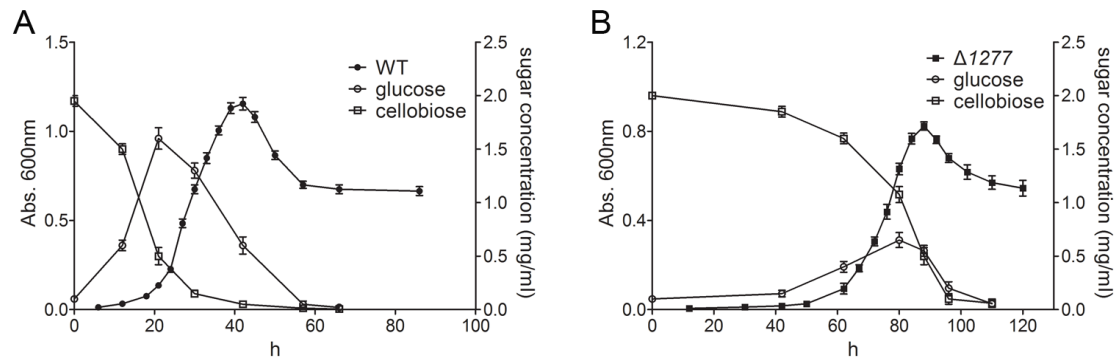

**Fig. S2.** Map of plasmid pCH.

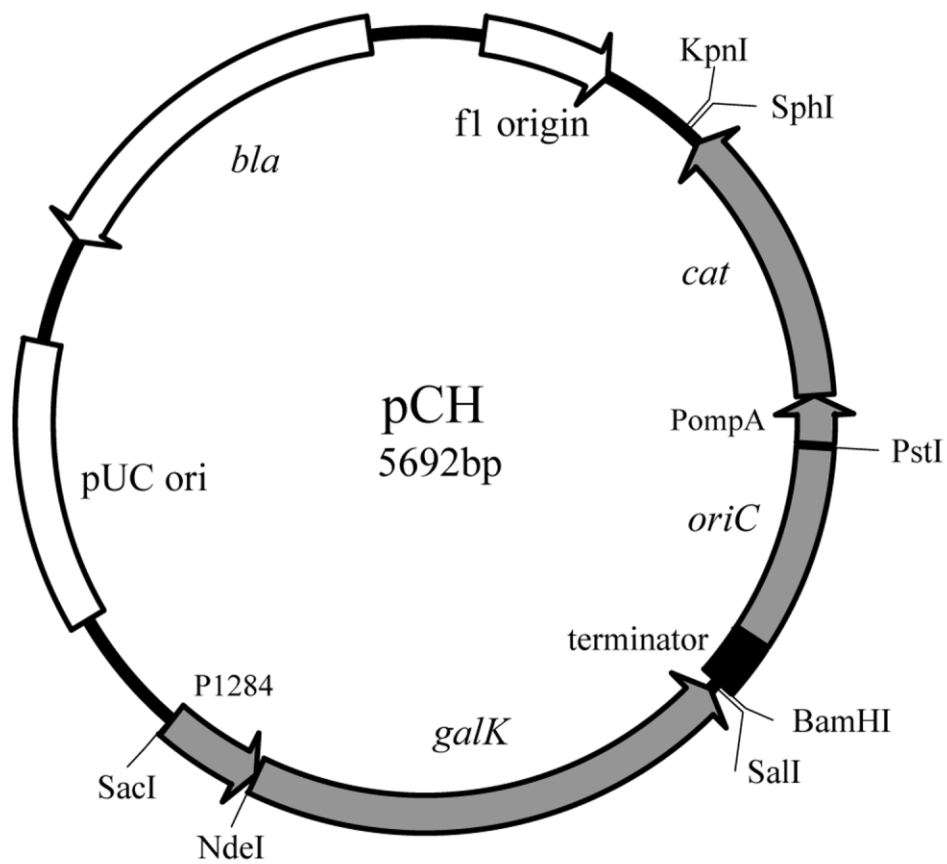

Supplement: AEM.00687-14_zam016145527so1.pdf [file AEM.00687-14_zam016145527so1.pdf]
